# Supplementary material
Source: PubMed Central journal article supplement (PMC5620419)

## PCR-based next generation sequencing (NGS) 53-Gene panel

Exons (codons) tested

**ABL1** 4 (243-274), 5 (275-303), 6 (303-321), 6 (321-362), 7 (395-424)  
**AKT1** 3 (16-49)  
**ALK** 23 (1172-1175), 25 (1248-1275)  
**APC** 16 (875-918), 16 (1113-1153), 16 (1257-1297), 16 (1288-1328), 16 (1318-1357), 16 (1349-1386), 16 (1377-1416), 16 (1416-1456), 16 (1456-1494), 16 (1493-1530), 16 (1530-1575)  
**ATM** 8 (353-355), 9 (409-412), 12 (601-633), 17 (846-880), 26 (1308-1331), 34 (1678-1719), 35 (1741-1773), 36 (1792-1832), 39 (1940-1973), 50 (2441-2479), 54 (2665-2670), 55 (2694-2717), 56 (2725-2756), 59 (2889-2891), 61 (2946-2950), 63 (3007-3051)  
**BRAF** 11 (439-471), 15 (581-606)  
**CDH1** 3 (77-117), 8 (369-379), 9 (399-439)  
**CSF1R** 7 (297-301), 22 (926-970)  
**CTNNB1** 3 (12-50)  
**DNMT3A** 23 (866-913)  
**EGFR** 3 (108-142), 7 (288-297), 15 (598-627), 18 (708-728), 19 (729-761), 20 (762-775), 20 (775-817), 21 (857-875)  
**ERBB2** 19 (754-769), 20 (772-818), 21 (839-883)  
**ERBB4** 3 (98-140), 4 (153-186), 6 (208-244), 7 (248-287), 8 (295-306), 9 (333-350), 15 (579-619), 23 (907-936)  
**EZH2** 16 (613-644)  
**FBXW7** 5 (243-278), 8 (375-394), 9 (429-471), 10 (473-508), 11 (549-583)  
**FGFR1** 4 (120-126), 7 (247-250)  
**FGFR2** 7 (250-273), 7 (273-311), 7 (302-313), 9 (362-382), 12 (521-550)  
**FGFR3** 7 (247-288), 9 (379-422), 14 (639-653), 15 (654-659), 18 (792-807)  
**FLT3** 11 (437-456), 14 (569-605), 16 (648-683), 20 (807-843)  
**GNA11** 4 (172-202), 6 (255-297), 7 (297-304), 7 (304-349)  
**GNAQ** 4 (159-202), 5 (202-210), 5 (210-245), 5 (241-245), 6 (246-263), 6 (263-297), 6 (291-297), 7 (297-324), 7 (324-360), 7 (355-360)  
**GNAS** 8 (200-220)  
**HNF1A** 3 (205-238), 4 (271-314)  
**HRAS** 2 (1-15), 3 (38-63)  
**IDH1** 4 (90-132)  
**IDH2** 4 (125-178)  
**JAK2** 14 (615-622)  
**JAK3** 13 (568-573), 16 (683-723)  
**KDR** 6 (220-248), 7 (267-276), 11 (471-476), 19 (872-874), 21 (946-985), 26 (1135-1146), 27 (1171-1211), 30 (1308-1352), 30 (1352-1357)  
**KIT** 2 (51-93), 9 (502-514), 10 (514-547), 10 (540-549), 11 (550-550), 11 (550-592), 13 (641-664), 14 (670-712), 15 (714-745), 17 (815-828), 18 (838-866)  
**KLHL6** 1 (1-13), 1 (13-73), 1 (73-98)  
**KRAS** 2 (1-22), 3 (38-63), 4 (103-147)  
**MET** 2 (168-209), 2 (375-400), 14 (1008-1028), 16 (1110-1132), 19 (1247-1284)  
**MLH1** 12 (383-426)  
**MPL** 10 (514-522)  
**NOTCH1** 26 (1562-1601), 27 (1673-1679)  
**NPM1** 11 (283-295)  
**NRAS** 2 (1-18), 3 (38-62)  
**PDGFRA** 12 (552-592), 14 (659-668), 15 (673-717), 18 (823-854)  
**PIK3CA** 2 (83-118), 5 (345-353), 8 (418-445), 10 (538-555), 14 (701-729), 21 (988-1027), 21 (1027-1069)  
**PTEN** 1 (5-27), 3 (67-70), 6 (170-210), 7 (212-221), 7 (221-266), 8 (287-332), 8 (332-342)  
**PTPN11** 3 (59-104), 13 (501-533)  
**RB1** 4 (127-158), 6 (199-203), 11 (357-376), 18 (570-605), 20 (659-700), 21 (703-733), 22 (746-775)  
**RET** 10 (610-627), 11 (628-667), 13 (766-798), 15 (880-910), 16 (918-934)

**SMAD4** 3 (119-142), 5 (167-208), 6 (243-263), 8 (310-319), 9 (329-373), 10 (385-424), 11 (443-480), 12 (496-535)  
**SMARCB1** 2 (39-78), 4 (156-167), 5 (199-210), 9 (381-386)  
**SMO** 3 (197-242), 5 (323-366), 6 (403-422)  
**STK11** 6 (261-288), 8 (332-370)  
**TP53** 2 (1-12), 4 (69-112), 5 (126-147), 5 (147-186), 5 (181-187), 6 (187-192), 6 (187-223), 6 (214-224), 7 (225-253), 8 (267-306), 10 (332-342)  
**VHL** 1 (88-114), 2 (129-155), 3 (157-200)  
**XPO1** 14 (501-522), 15 (523-539), 15 (539-575)  
 Coverage by gene and codon(s) tested for indeterminate amplicons  
**CDKN2A** 2 (51-70)  
**FGFR3** 16 (692-723)  
**GNA11** 4 (159-172), 5 (202-216), 7 (349-360)  
**NOTCH1** 34 (2467-2526)  
**RB1** 17 (550-565)  
**SMO** 9 (533-551), 11 (639-646)  
**SRC** 14 (530-537)  
**STK11** 1 (36-77), 4 (193-199), 5 (200-211)

### PCR-based next generation sequencing (NGS) 28-Gene panel

| <u>Gene</u>   | <u>Exons (codons) tested</u>                                                                                                                                                                                                                                                                                                                                                                                                                                                                                                                                                                                                                                                                                                                                                                                                                      |
|---------------|---------------------------------------------------------------------------------------------------------------------------------------------------------------------------------------------------------------------------------------------------------------------------------------------------------------------------------------------------------------------------------------------------------------------------------------------------------------------------------------------------------------------------------------------------------------------------------------------------------------------------------------------------------------------------------------------------------------------------------------------------------------------------------------------------------------------------------------------------|
| <b>ABL1</b>   | 1 (1-27), 2 (27-41), 2 (41-85), 3 (85-99), 3 (92-129), 3 (128-167), 3 (167-183), 4 (184-200), 4 (195-235), 4 (235-274), 5 (275-303), 6 (303-317), 6 (307-347), 6 (347-362), 7 (362-382), 7 (382-424), 8 (424-444), 8 (444-475), 9 (475-489), 9 (489-505), 10 (505-523), 11 (560-576), 11 (567-606), 11 (598-638), 11 (661-700), 11 (691-731), 11 (723-762), 11 (752-790), 11 (781-820), 11 (810-851), 11 (843-882), 11 (873-912), 11 (904-944), 11 (935-975), 11 (965-1003), 11 (995-1034), 11 (1070-1112), 11 (1112-1131)                                                                                                                                                                                                                                                                                                                        |
| <b>ASXL1</b>  | 2 (20-33), 2 (33-47), 3 (47-62), 3 (62-84), 4 (85-104), 4 (96-125), 5 (125-148), 5 (148-157), 6 (158-171), 6 (171-189), 7 (189-206), 7 (206-240), 8 (240-253), 8 (250-288), 8 (287-294), 9 (295-296), 9 (296-327), 10 (327-341), 10 (341-362), 11 (362-377), 11 (368-407), 11 (398-437), 11 (427-468), 11 (468-508), 11 (508-545), 11 (545-573), 12 (574-589), 12 (581-619), 12 (610-649), 12 (640-678), 12 (670-709), 12 (701-740), 12 (732-771), 12 (762-801), 12 (792-831), 12 (821-860), 12 (851-889), 12 (880-919), 12 (911-949), 12 (940-979), 12 (970-1009), 12 (999-1038), 12 (1031-1069), 12 (1061-1100), 12 (1091-1129), 12 (1123-1160), 12 (1153-1191), 12 (1182-1221), 12 (1212-1251), 12 (1241-1281), 12 (1271-1311), 12 (1301-1341), 12 (1336-1375), 12 (1369-1409), 12 (1408-1448), 12 (1448-1486), 12 (1486-1529), 12 (1529-1542) |
| <b>BRAF</b>   | 2 (47-73), 2 (73-80), 3 (81-119), 3 (119-157), 3 (147-168), 4 (169-187), 4 (187-203), 5 (203-234), 5 (234-237), 6 (238-273), 6 (273-287), 7 (287-311), 7 (311-327), 8 (327-351), 8 (351-380), 9 (381-386), 10 (393-425), 10 (425-438), 11 (439-465), 12 (478-493), 12 (493-506), 13 (506-518), 13 (518-555), 13 (555-565), 14 (565-581), 15 (581-619), 15 (619-620), 16 (621-654), 16 (654-664), 17 (665-697), 17 (697-709), 18 (710-729), 18 (729-767)                                                                                                                                                                                                                                                                                                                                                                                           |
| <b>DNMT3A</b> | 2 (1-24), 3 (25-42), 3 (42-59), 4 (89-133), 4 (132-150), 5 (150-164), 7 (214-228), 7 (228-268), 7 (268-285), 8 (286-322), 8 (322-338), 9 (339-353), 9 (353-374), 10 (375-402), 10 (402-427), 11 (427-443), 11 (443-477), 12 (477-486), 12 (477-492), 13 (492-518), 14 (519-538), 14 (538-556), 15 (556-583), 15 (583-617), 16 (631-646), 17 (646-679), 17 (679-694), 18 (695-720), 18 (720-725), 19 (725-739), 19 (729-768), 19 (759-774), 20 (775-803), 22 (827-851), 22 (851-866), 23 (866-900), 23 (900-913)                                                                                                                                                                                                                                                                                                                                   |

**EGFR** 2 (30-42), 2 (42-80), 3 (81-96), 3 (89-128), 3 (128-142), 4 (142-158), 4 (158-187), 5 (187-210), 6 (210-234), 7 (250-273), 7 (273-297), 8 (297-317), 8 (317-336), 9 (336-353), 9 (343-378), 9 (377-378), 10 (378-385), 10 (385-403), 11 (403-433), 12 (433-444), 12 (438-478), 12 (478-500), 13 (521-544), 14 (544-559), 14 (559-574), 15 (575-591), 15 (591-627), 16 (627-640), 17 (640-659), 17 (659-687), 18 (688-702), 18 (702-728), 19 (729-743), 19 (743-761), 20 (762-784), 20 (784-823), 21 (824-849), 21 (849-875), 22 (876-901), 23 (901-916), 23 (916-950), 24 (950-982), 25 (983-998), 25 (998-1038), 26 (1039-1054), 27 (1055-1070), 27 (1070-1091), 28 (1091-1104), 28 (1096-1133), 28 (1171-1211)

**EZH2** 2 (1-18), 2 (18-39), 3 (40-69), 3 (69-82), 4 (83-114), 4 (114-121), 5 (122-139), 5 (139-162), 6 (162-196), 6 (196-209), 7 (209-227), 7 (227-243), 8 (243-283), 8 (283-303), 9 (303-321), 9 (321-333), 10 (334-364), 10 (364-404), 10 (395-414), 11 (414-429), 11 (429-466), 11 (460-470), 12 (471-487), 12 (487-502), 13 (502-516), 14 (516-529), 14 (529-558), 15 (558-569), 15 (569-610), 15 (606-617), 16 (618-634), 16 (634-649), 17 (650-677), 18 (677-704), 19 (704-728), 19 (719-732), 20 (732-752)

**FLT3** 2 (15-43), 2 (43-55), 3 (56-71), 3 (71-112), 3 (103-123), 4 (123-147), 4 (147-162), 5 (162-189), 5 (189-205), 6 (205-234), 6 (234-248), 7 (248-272), 7 (272-294), 8 (295-311), 8 (301-340), 8 (331-346), 9 (346-382), 9 (382-402), 10 (402-437), 11 (437-463), 11 (463-473), 12 (473-514), 12 (514-533), 13 (533-563), 13 (563-568), 14 (569-573), 14 (573-610), 14 (606-613), 15 (613-614), 15 (613-642), 15 (635-648), 16 (648-668), 16 (668-685), 17 (685-723), 17 (723-736), 18 (736-764), 19 (764-805), 19 (805-806), 20 (807-832), 20 (832-847), 21 (848-862), 21 (862-885), 22 (885-892), 22 (892-918), 23 (918-933), 23 (933-953), 24 (954-976), 24 (976-994)

**GATA1** 2 (1-16), 2 (13-51), 2 (51-74), 3 (74-89), 3 (81-120), 3 (111-151), 3 (142-182), 4 (200-227), 4 (227-248), 5 (249-265), 5 (265-290), 6 (291-306), 6 (297-336)

**GATA2** 2 (1-20), 3 (77-96), 3 (96-140), 3 (181-220), 3 (242-280), 3 (273-291), 4 (318-339), 5 (340-358), 5 (358-381), 6 (399-439), 6 (434-474), 6 (466-481)

**HRAS** 2 (18-37), 3 (38-63), 3 (63-97), 4 (97-129), 5 (151-190)

**IDH1** 3 (1-13), 4 (41-59), 4 (59-100), 4 (92-131), 4 (121-138), 5 (139-172), 5 (172-174), 6 (174-191), 6 (191-228), 6 (223-233), 7 (233-266), 7 (266-284), 8 (284-317), 8 (317-331), 9 (331-370), 9 (370-385), 10 (385-404), 10 (404-415)

**IDH2** 1 (1-39), 2 (39-69), 3 (106-125), 4 (125-167), 4 (167-178), 5 (179-181), 5 (181-220), 5 (212-226), 6 (227-262), 6 (262-272), 7 (272-281), 7 (278-317), 7 (308-323), 9 (361-370), 9 (370-393), 10 (393-417), 10 (408-424), 11 (424-453)

**IKZF2** 2 (1-12), 3 (12-23), 3 (23-47), 4 (47-60), 4 (60-99), 4 (91-129), 4 (121-136), 5 (136-178), 5 (178-192), 6 (192-223), 6 (223-238), 7 (238-270), 7 (270-286), 8 (286-312), 8 (312-351), 8 (351-393), 8 (393-432), 8 (424-463), 8 (454-494), 8 (484-524), 8 (514-527)

**JAK2** 3 (11-48), 3 (48-76), 4 (76-92), 4 (92-117), 5 (117-137), 5 (137-156), 6 (157-185), 6 (185-205), 7 (205-220), 7 (241-281), 7 (281-312), 8 (313-328), 8 (328-352), 9 (353-364), 9 (359-398), 9 (398-405), 10 (405-418), 10 (418-442), 11 (443-456), 11 (451-488), 11 (488-505), 12 (505-515), 12 (515-547), 13 (548-569), 13 (569-592), 14 (593-607), 14 (607-622), 15 (622-627), 15 (627-664), 16 (665-676), 16 (676-711), 17 (711-723), 17 (747-761), 18 (762-777), 18 (777-812), 19 (812-831), 19 (831-857), 20 (858-893), 20 (893-921), 21 (921-949), 21 (939-962), 22 (963-981), 22 (981-1020), 23 (1020-1039), 23 (1039-1059), 24 (1060-1079), 24 (1079-1097), 25 (1098-1111), 25 (1111-1133)

**KIT** 1 (1-23), 2 (23-41), 2 (41-80), 2 (80-113), 3 (113-128), 3 (119-157), 3 (152-189), 3 (189-207), 4 (207-219), 4 (219-252), 5 (253-292), 5 (253-254), 5 (292-309), 6 (309-321), 6 (318-353), 6 (353-372), 7 (372-386), 7 (386-411), 8 (411-428), 8 (428-449), 9 (449-460), 9 (454-493), 9 (493-

514), 10 (514-532), 10 (523-549), 11 (550-565), 11 (565-592), 12 (592-606), 12 (597-627), 13 (627-643), 13 (643-664), 14 (664-681), 14 (681-714), 15 (714-727), 15 (727-745), 16 (745-765), 16 (765-787), 17 (788-806), 17 (806-828), 18 (829-842), 18 (834-866), 19 (866-873), 19 (873-899), 20 (899-914), 20 (914-934), 21 (935-948), 21 (948-977)

**KRAS** 2 (1-26), 2 (26-37), 3 (38-43), 3 (43-87), 3 (81-97), 4 (97-135), 4 (135-150), 5 (151-180), 5 (180-189)

**MDM2** 1 (1-5), 2 (5-22), 2 (22-33), 3 (34-58), 4 (59-62), 4 (62-103), 5 (103-109), 5 (109-120), 7 (143-156), 7 (156-175), 8 (175-199), 8 (199-228), 9 (229-251), 9 (251-280), 10 (281-298), 10 (298-306), 11 (307-323), 11 (313-352), 11 (342-379), 11 (370-408), 11 (403-444), 11 (444-483), 11 (483-498)

**MLL** 2 (145-168), 3 (168-182), 3 (178-215), 3 (206-244), 3 (236-274), 3 (265-303), 3 (293-332), 3 (325-362), 3 (353-392), 3 (390-427), 3 (418-456), 3 (476-515), 3 (506-544), 3 (534-573), 3 (564-603), 3 (594-632), 3 (624-662), 3 (653-691), 3 (682-722), 3 (714-753), 3 (743-780), 3 (771-809), 3 (799-837), 3 (831-870), 3 (870-910), 3 (910-950), 3 (949-988), 3 (988-1029), 3 (1029-1052), 4 (1053-1064), 4 (1063-1103), 4 (1103-1112), 5 (1112-1129), 5 (1121-1161), 5 (1161-1190), 6 (1190-1212), 7 (1218-1257), 7 (1257-1296), 7 (1296-1338), 8 (1338-1362), 9 (1363-1381), 9 (1381-1406), 10 (1407-1422), 10 (1422-1444), 11 (1445-1458), 11 (1458-1493), 12 (1494-1507), 13 (1526-1566), 14 (1566-1578), 14 (1578-1604), 15 (1604-1617), 15 (1610-1647), 15 (1647-1665), 16 (1666-1691), 16 (1691-1723), 17 (1724-1737), 17 (1737-1760), 18 (1761-1774), 18 (1774-1785), 19 (1785-1805), 19 (1796-1836), 19 (1836-1850), 20 (1850-1866), 20 (1866-1885), 21 (1886-1907), 21 (1907-1931), 22 (1932-1943), 22 (1940-1979), 23 (1985-1999), 23 (1999-2024), 24 (2032-2050), 25 (2050-2063), 25 (2063-2104), 26 (2104-2114), 26 (2111-2151), 26 (2151-2166), 27 (2166-2186), 27 (2176-2214), 27 (2204-2244), 27 (2236-2274), 27 (2264-2303), 27 (2295-2334), 27 (2324-2362), 27 (2354-2392), 27 (2382-2422), 27 (2413-2451), 27 (2443-2480), 27 (2471-2511), 27 (2502-2542), 27 (2533-2570), 27 (2561-2600), 27 (2591-2629), 27 (2619-2660), 27 (2651-2690), 27 (2710-2747), 27 (2798-2836), 27 (2827-2864), 27 (2856-2894), 27 (2885-2924), 27 (2914-2953), 27 (2946-2983), 27 (2974-3012), 27 (3003-3041), 27 (3032-3072), 27 (3063-3102), 27 (3092-3131), 27 (3123-3161), 27 (3152-3190), 27 (3183-3222), 27 (3222-3261), 27 (3261-3300), 27 (3299-3338), 27 (3338-3376), 27 (3376-3414), 27 (3414-3454), 27 (3453-3492), 27 (3492-3530), 27 (3530-3570), 27 (3570-3582), 28 (3582-3609), 29 (3609-3631), 30 (3631-3645), 30 (3645-3688), 31 (3688-3713), 32 (3713-3729), 32 (3720-3758), 32 (3755-3771), 33 (3771-3775), 33 (3775-3807), 34 (3807-3810), 34 (3810-3835), 35 (3835-3852), 35 (3852-3878), 36 (3879-3891), 36 (3882-3921), 36 (3918-3958), 36 (3958-3970)

**MPL** 1 (1-17), 1 (7-27), 2 (27-61), 2 (61-71), 3 (71-88), 3 (81-122), 4 (131-147), 4 (146-189), 4 (189-230), 5 (231-246), 5 (246-285), 6 (285-303), 6 (303-327), 7 (327-346), 7 (336-375), 7 (370-389), 8 (389-396), 8 (396-436), 9 (455-490), 11 (522-551), 12 (552-566), 12 (559-600), 12 (600-636)

**MYD88** 1 (10-50), 1 (41-82), 1 (82-123), 2 (123-143), 2 (143-168), 3 (168-184), 3 (174-213), 3 (211-228), 4 (228-229), 4 (229-259), 5 (259-275), 5 (275-310)

**NOTCH1** 1 (1-21), 2 (21-47), 3 (47-88), 3 (88-128), 3 (120-135), 4 (197-237), 5 (248-266), 5 (266-289), 6 (318-357), 6 (350-367), 8 (419-443), 8 (434-475), 8 (466-481), 9 (481-504), 9 (504-519), 10 (519-538), 10 (538-557), 11 (632-635), 12 (635-650), 12 (650-672), 13 (716-736), 14 (736-770), 14 (770-785), 16 (823-847), 17 (863-885), 18 (914-940), 18 (940-981), 21 (1126-1166), 21 (1157-1170), 22 (1171-1196), 23 (1253-1294), 24 (1304-1338), 24 (1335-1338), 25 (1373-1413), 25 (1449-1491), 25 (1481-1523), 25 (1513-1529), 26 (1529-1549), 26 (1549-1591), 29

(1803-1824), 30 (1825-1843), 30 (1835-1874), 30 (1865-1880), 31 (1895-1935), 31 (1965-1978), 32 (2012-2028), 33 (2028-2052), 33 (2043-2060), 34 (2085-2131), 34 (2131-2170), 34 (2170-2210), 34 (2210-2251), 34 (2251-2293), 34 (2293-2335), 34 (2326-2364), 34 (2356-2398), 34 (2388-2430), 34 (2420-2460), 34 (2451-2489), 34 (2481-2521), 34 (2540-2556)

**NPM1** 1 (1-20), 2 (20-31), 2 (31-46), 3 (47-61), 3 (61-86), 4 (87-100), 4 (100-118), 5 (118-131), 5 (123-153), 6 (154-164), 6 (164-175), 7 (175-194), 8 (195-223), 9 (224-243), 9 (243-257), 10 (258-282), 11 (283-295)

**NRAS** 2 (1-21), 2 (21-37), 3 (77-97), 4 (97-134), 4 (134-150), 5 (151-169), 5 (169-190)

**PTPN11** 2 (5-7), 2 (7-46), 3 (46-60), 3 (54-92), 3 (92-111), 4 (111-134), 4 (134-175), 5 (176-196), 5 (196-214), 6 (215-240), 6 (240-252), 7 (253-268), 7 (268-285), 8 (285-299), 9 (312-317), 9 (317-355), 9 (355-364), 10 (365-377), 10 (377-408), 11 (409-423), 11 (423-460), 12 (460-483), 13 (483-496), 13 (496-533), 14 (534-564), 14 (564-571), 15 (571-594)

**RUNX1** 3 (20-31), 3 (31-33), 4 (62-101), 4 (97-117), 5 (118-142), 5 (142-170), 6 (170-187), 6 (187-205), 7 (205-249), 8 (269-310), 8 (310-323), 9 (323-354), 9 (354-397), 9 (396-435), 9 (460-481)

**TET2** 3 (1-22), 3 (13-52), 3 (44-82), 3 (73-112), 3 (103-140), 3 (132-171), 3 (162-200), 3 (191-229), 3 (220-259), 3 (250-288), 3 (279-318), 3 (308-347), 3 (337-376), 3 (369-408), 3 (399-439), 3 (429-468), 3 (459-498), 3 (488-527), 3 (518-557), 3 (549-586), 3 (577-616), 3 (636-674), 3 (665-704), 3 (694-732), 3 (723-762), 3 (752-790), 3 (783-823), 3 (823-860), 3 (859-896), 3 (896-935), 3 (935-975), 3 (975-1014), 3 (1013-1051), 3 (1051-1090), 3 (1090-1127), 3 (1127-1137), 4 (1137-1145), 4 (1145-1167), 5 (1167-1182), 5 (1182-1198), 6 (1199-1216), 6 (1207-1249), 6 (1249-1268), 7 (1268-1283), 7 (1283-1318), 8 (1319-1321), 8 (1321-1348), 9 (1349-1369), 9 (1369-1394), 10 (1395-1408), 10 (1399-1438), 10 (1432-1474), 10 (1474-1513), 11 (1513-1533), 11 (1523-1563), 11 (1555-1593), 11 (1585-1622), 11 (1612-1651), 11 (1643-1683), 11 (1674-1712), 11 (1703-1740), 11 (1736-1775), 11 (1774-1813), 11 (1813-1850), 11 (1850-1891), 11 (1890-1929), 11 (1929-1969), 11 (1969-2003)

**TP53** 4 (41-80), 4 (72-112), 4 (107-125), 5 (126-162), 5 (162-187), 6 (187-214), 6 (210-224), 7 (234-261), 8 (261-276), 8 (276-307), 9 (307-324), 9 (324-331), 10 (332-349), 10 (349-367)

**WT1** 1 (25-63), 1 (163-204), 1 (197-216), 2 (216-240), 2 (240-257), 4 (291-304), 4 (304-317), 5 (317-334), 6 (334-352), 6 (352-366), 7 (367-400), 7 (400-417), 8 (417-433), 8 (433-447), 9 (477-478), 10 (478-505), 10 (505-518)

**Table S1. Identified mutations by NGS or Sanger sequencing**

| UPN | WHO subtype | Gene          | c.DNA change       | Amino acid change |
|-----|-------------|---------------|--------------------|-------------------|
| 3   | MDS-EB      | <i>DNMT3A</i> | c.2645G>A          | p.R882H           |
|     |             | <i>U2AF1</i>  | c.101C>T           | p.S34F            |
| 8   | MDS-MLD     | <i>U2AF1</i>  | c.101C>T           | p.S34F            |
| 11  | MDS-SLD     | <i>TP53</i>   | c.644G>T           | p.S215I           |
| 12  | CMML        | <i>NRAS</i>   | c.35G>A            | p.G12D            |
| 15  | CMML        | <i>ASXL1</i>  | c.3053_3055delinsG | p.T1018fs         |
|     |             | <i>SRSF2</i>  | c.284C>G           | p.P95R            |
| 17  | MDS-MLD     | <i>DNMT3A</i> | c.2695C>T          | p.R899C           |
| 20  | MDS-EB      | <i>GNAQ</i>   | c.515A>G           | p.Y172C           |
| 21  | MDS del(5q) | <i>SF3B1</i>  | c.2098A>G          | p.K700E           |
| 22  | MDS-SLD     | <i>APC</i>    | c.3920T>A          | p.I1307K          |
| 23  | MDS-EB      | <i>SF3B1</i>  | c.1852A>G          | p.D618G           |
| 25  | MDS-MLD     | <i>U2AF1</i>  | c.470A>C           | p.Q157P           |
| 27  | MDS-MLD     | <i>RUNX1</i>  | c.146_147insC      | p.G50fs           |
|     |             | <i>TET2</i>   | c.3811del          | p.C1271fs         |
|     |             | <i>U2AF1</i>  | c.470A>C           | p.Q157P           |
|     |             | <i>ZRSR2</i>  | c.18542A del       |                   |
| 29  | CMML        | <i>NRAS</i>   | c.181C>G           | p.Q61E            |
|     |             | <i>NRAS</i>   | c.34G>C            | p.G12R            |
|     |             | <i>TP53</i>   | c.869G>A           | p.R290H           |
|     |             | <i>SRSF2</i>  | c.284C>A           | p.P95H            |
| 30  | MDS-RS      | <i>SF3B1</i>  | c.1866G>C          | p.E622D           |
| 32  | MDS-MLD     | <i>IDH2</i>   | c.419G>A           | p.R140Q           |
| 35  | CMML        | <i>RUNX1</i>  | c.318G>A           | p.W106*           |
|     |             | <i>TET2</i>   | c.3840del          | p.C1281fs         |
|     |             | <i>TET2</i>   | c.5026del          | p.H1676fs         |
| 36  | MDS-EB      | <i>TET2</i>   | c.1621del          | p.L541*           |
|     |             | <i>TET2</i>   | c.5125del          | p.C1709fs         |
| 37  | MDS-MLD     | <i>SF3B1</i>  | c.2098A>G          | p.K700E           |
| 38  | MDS-RS      | <i>SF3B1</i>  | c.2098A>G          | p.K700E           |
| 43  | MDS-EB      | <i>U2AF1</i>  | c.101C>A           | p.S34Y            |
| 44  | MDS-EB      | <i>DNMT3A</i> | c.2645G>A          | p.R882H           |
| 48  | MDS-MLD     | <i>TP53</i>   | c.28G>A            | p.V10I            |
| 52  | MDS-EB      | <i>RUNX1</i>  | c.784C>T           | p.Q262*           |
| 53  | MDS/MPD     | <i>ASXL1</i>  | c.1934_1935insG    | p.G646fs          |
|     |             | <i>TET2</i>   | c.2662C>T          | p.Q888*           |
|     |             | <i>SRSF2</i>  | c.284C>T           | p.P95L            |
| 54  | CMML        | <i>ASXL1</i>  | c.1878_1879del     | p.A627fs          |
|     |             | <i>TET2</i>   | c.4546C>T          | p.R1516*          |
|     |             | <i>TET2</i>   | c.5219T>A          | L1740*            |
| 57  | MDS-EB      | <i>IDH2</i>   | c.419G>A           | p.R140Q           |
| 58  | CMML        | <i>TET2</i>   | c.3646C>T          | p.R1216*          |

|    |         |               |                                          |           |
|----|---------|---------------|------------------------------------------|-----------|
|    |         | <i>TET2</i>   | c.4621C>T                                | p.Q1541*  |
| 62 | MDS-EB  | <i>TP53</i>   | c.711G>A                                 | p.M237I   |
| 63 | MDS-EB  | <i>FLT3</i>   | c.2503G>T                                | p.D835Y   |
|    |         | <i>TET2</i>   | c.4964del                                | p.P1655fs |
| 64 | MDS-EB  | <i>IDH2</i>   | c.419G>A                                 | p.R140Q   |
| 66 | CMML    | <i>IDH2</i>   | c.419G>A                                 | p.R140Q   |
|    |         | <i>RUNX1</i>  | c.1070dupC                               | p.T358fs  |
| 68 | CMML    | <i>TET2</i>   | c.3812dupG                               | p.C1271fs |
| 70 | MDS-EB  | <i>TET2</i>   | c.2746C>T                                | p.Q916*   |
|    |         | <i>TET2</i>   | c.1337T>G                                | p.L446*   |
| 71 | MDS-RS  | <i>TET2</i>   | c.3501-2A>C                              |           |
| 72 | MDS-SLD | <i>ASXL1</i>  | c.3637_3640del                           | p.L1213fs |
| 73 | MDS-EB  | <i>KRAS</i>   | c.436G>C                                 | p.A146P   |
| 74 | MDS-U   | <i>RUNX1</i>  | c.485G>A                                 | p.R162K   |
|    |         | <i>SRSF2</i>  | c.284C>A                                 | p.P95H    |
| 75 | MDS-EB  | <i>SF3B1</i>  | c.2098A>G                                | p.K700E   |
| 76 | MDS-MLD | <i>TET2</i>   | c.1763C>G                                | p.S588*   |
| 77 | MDS-MLD | <i>ASXL1</i>  | c.1773C>A                                | p.Y591*   |
| 78 | CMML    | <i>RUNX1</i>  | c.496C>G                                 | p.R166G   |
|    |         | <i>TET2</i>   | c.2746C>T                                | p.Q916*   |
|    |         | <i>TET2</i>   | c.553C>T                                 | p.Q185*   |
| 79 | CMML    | <i>KIT</i>    | c.2447A>T                                | p.D816V   |
| 80 | MDS-U   | <i>TP53</i>   | c.814G>A                                 | p.V272M   |
|    |         | <i>TP53</i>   | c.528C>A                                 | p.C176*   |
| 81 | CMML    | <i>TET2</i>   | c.3415del                                | p.I1139fs |
|    |         | <i>TET2</i>   | c.4940del                                | p.G1647fs |
| 82 | MDS/MPD | <i>JAK2</i>   | c.1849G>T                                | p.V617F   |
|    |         | <i>SF3B1</i>  | c.2098A>G                                | p.K700E   |
| 83 | MDS-MLD | <i>TET2</i>   | c.4854C>A                                | p.Y1618*  |
| 86 | MDS-MLD | <i>MPL</i>    | c.1775G>A                                | p.R592Q   |
|    |         | <i>MPL</i>    | c.775G>A                                 | p.E259K   |
|    |         | <i>TET2</i>   | c.3646C>T                                | p.R1216*  |
|    |         | <i>TET2</i>   | c.1612C>T                                | p.Q538*   |
|    |         | <i>TET2</i>   | c.3092del                                | p.H1031fs |
| 88 | MDS-U   | <i>RUNX1</i>  | c.484A>G                                 | p.R162G   |
|    |         | <i>TP53</i>   | c.1009C>T                                | p.R337C   |
|    |         | <i>TP53</i>   | c.613T>C                                 | p.Y205H   |
| 89 | MDS-EB  | <i>RUNX1</i>  | c.477_499dupTGACCTCAGGTTTG<br>TCGGTTCGAA | p.S167fs  |
| 92 | MDS-EB  | <i>TET2</i>   | c.5219T>A                                | p.L1740*  |
| 93 | MDS-RS  | <i>IDH2</i>   | c.419G>A                                 | p.R140Q   |
|    |         | <i>SF3B1</i>  | c.2098A>G                                | p.K700E   |
| 94 | MDS-SLD | <i>BRAF</i>   | c.1406G>C                                | p.G469A   |
| 96 | MDS-EB  | <i>NPM1</i>   | c.863_864insCCTG                         | p.W288fs  |
| 97 | MDS-SLD | <i>DNMT3A</i> | c.1903C>T                                | p.R635W   |

|     |         |               |                     |                    |
|-----|---------|---------------|---------------------|--------------------|
|     |         | <i>NPM1</i>   | c.860_863dupTCTG    | p.W288fs           |
| 98  | CMML    | <i>KRAS</i>   | c.436G>A            | p.A146T            |
| 99  | MDS-EB  | <i>RUNX1</i>  | c.485G>A            | p.R162K            |
| 102 | MDS/MPD | <i>JAK2</i>   | c.1849G>T           | p.V617F            |
| 103 | MDS-U   | <i>ASXL1</i>  | c.1900_1922del      | p.E635fs           |
| 105 | MDS-U   | <i>DNMT3A</i> | c.2053_2063delinsTG | p.G685_R688delinsC |
| 107 | MDS-EB  | <i>ASXL1</i>  | c.1934dupG          | p.G646fs*          |
|     |         | <i>TET2</i>   | c.3699G>A           | p.W1233*           |
| 108 | MDS-MLD | <i>TP53</i>   | c.398T>G            | p.M133R            |
| 109 | MDS-RS  | <i>SF3B1</i>  | c.2098A>G           | p. K700E           |
| 110 | MDS-MLD | <i>ASXL1</i>  | c.1888_1910del      | p.E635fs           |
|     |         | <i>EZH2</i>   | c.952del            | p.T318fs           |
|     |         | <i>TET2</i>   | c.1842del           | p.G614fs           |
|     |         | <i>TET2</i>   | c.4767T>G           | p.Y1589*           |
| 112 | MDS-RS  | <i>JAK2</i>   | c.1849G>T           | p.V617F            |
| 113 | MDS-MLD | <i>TET2</i>   | c.4546C>T           | p.R1516*           |
| 114 | MDS-MLD | <i>ZRSR2</i>  | c.26036Gdel         |                    |
| 117 | MDS-RS  | <i>EZH2</i>   | c.371A>T            | p.D124V            |
|     |         | <i>TET2</i>   | c.1676_1677del      | p.Y559fs           |
|     |         | <i>SF3B1</i>  | c.1996A>G           | p.K666E            |
|     |         | <i>SRSF2</i>  | c.284C>A            | p. P95H            |
|     |         | <i>ZRSR2</i>  | c.26036Gdel         |                    |

MDS-EB: MDS with excess blasts. CMML: chronic myelomonocytic leukemia. MDS/MPN-U: MDS/MPN unclassifiable. MDS-MLD: MDS with multilineage dysplasia. MDS-SLD: MDS with single lineage dysplasia.



**Table S2. Clinical characteristics of the 38 patients with no detectable mutations**

| <b>Variable</b>                 | <b>N(%)/Median [Range]</b> |
|---------------------------------|----------------------------|
| Age (years)                     | 73 [44-83]                 |
| Male                            | 23 (61)                    |
| Hgb (g/dL)                      | 10.2 [7.3-14.8]            |
| WBC (x10 <sup>9</sup> /L)       | 3.1 [0.7-20.3]             |
| ANC (x10 <sup>9</sup> /L)       | 1.3 [0.2-11.5]             |
| Platelets (x10 <sup>9</sup> /L) | 78 [7-404]                 |
| Bone marrow blasts (%)          | 3 [0-9]                    |
| WHO diagnosis                   |                            |
| MDS-SLD                         | 9 (24)                     |
| MDS-RS                          | 1 (3)                      |
| MDS-MLD                         | 18 (47)                    |
| MDS-EB                          | 5 (13)                     |
| MDS/MPN-U                       | 1 (3)                      |
| CMML                            | 4 (11)                     |
| Therapy-related MDS             | 7 (18)                     |
| ≥2 cytopenias                   | 21 (55)                    |
| Transfusion dependence          | 19 (50)                    |
| BM blasts percentage            |                            |
| Blasts≥5%                       | 9 (24)                     |
| Karyotype                       |                            |
| Normal                          | 16 (42)                    |
| Del(20q)                        | 2 (5)                      |
| Del(11q)                        | 1 (3)                      |
| -Y                              | 2 (5)                      |
| Trisomy 8                       | 4 (11)                     |
| Del(5q)                         | 1 (3)                      |
| Del(7q)/-7                      | 2 (5)                      |
| Other                           | 9 (24)                     |
| Unavailable                     | 1 (3)                      |
| IPSS risk group                 |                            |
| Low                             | 5 (13)                     |
| Intermediate-1                  | 33 (88)                    |
| MDACC LR-MDS score              |                            |
| Low                             | 4 (11)                     |
| Intermediate                    | 20 (53)                    |
| High                            | 14 (36)                    |
| Prior therapy                   |                            |
| Growth factors                  | 6 (16)                     |
| Others                          | 2 (5)                      |
| Time from diagnosis (weeks)     | 7 [1-205]                  |

**Table S3. Erythropoietin levels and red blood cell transfusion requirements of anemic patients without prior erythropoietin-stimulating agent exposure (n=38)**

|                                         |                | Erythropoietin level |             |          |
|-----------------------------------------|----------------|----------------------|-------------|----------|
|                                         |                | <100 U/L             | 100-500 U/L | >500 U/L |
| Red blood cell transfusion requirements | <2 units/month | 6 (16%)              | 11 (29%)    | 1 (3%)   |
|                                         | ≥2 units/month | 7 (18%)              | 6 (16%)     | 7 (18%)  |

Putative erythroid responses to G-CSF plus erythropoietin-stimulating agent (ESA) are 74% in the high response group (green), 23% in the intermediate response group (yellow), and 7% in the low response group (red). This predicted response with G-CSF plus ESA is based on published data from Hellström-Lindberg E, Negrin R, Stein R et al. Erythroid response to treatment with G-CSF plus erythropoietin for the anaemia of patients with myelodysplastic syndromes: proposal for a predictive model. *Br J Haematol.* 1997;99:344-351.

**Table S4. Univariate analysis for response based on detected mutations.** Only mutations detected in >5% of evaluated patients who were evaluable for response were included in this analysis.

| Gene   | Overall response<br>N (%) |            | OR [95% CI]          | p value |
|--------|---------------------------|------------|----------------------|---------|
|        | Wildtype                  | Mutated    |                      |         |
| ASXL1  | 34/50 (68)                | 6/8 (75)   | 1.412 [0.256-7.783]  | 0.692   |
| DNMT3A | 60/96 (63)                | 2/5 (40)   | 0.400 [0.064-2.509]  | 0.328   |
| IDH2   | 58/96 (60)                | 4/5 (80)   | 2.621 [0.282-24.352] | 0.397   |
| RUNX1  | 34/49 (69)                | 6/9 (67)   | 0.882 [0.194-4.007]  | 0.871   |
| SF3B1  | 26/41 (63)                | 5/9 (56)   | 0.721 [0.167-3.106]  | 0.661   |
| SRSF2  | 27/45 (60)                | 4/5 (80)   | 2.667 [0.275-25.838] | 0.397   |
| TET2   | 26/39 (67)                | 14/19 (74) | 1.400 [0.414-4.737]  | 0.589   |
| TP53   | 57/94 (61)                | 5/7 (71)   | 1.623 [0.299-8.806]  | 0.575   |
| U2AF1  | 28/45 (62)                | 3/5 (60)   | 0.911 [0.138-6.016]  | 0.923   |

**Table S5. Univariate analysis for survival for detected mutations.** Only mutations detected in >5% of evaluated patients where included in this analysis.

| Gene          | Deaths<br>N (%) |           | Median OS<br>(months) |         | HR [95% CI]            | P<br>value |
|---------------|-----------------|-----------|-----------------------|---------|------------------------|------------|
|               | Wildtype        | Mutated   | Wildtype              | Mutated |                        |            |
| <i>ASXL1</i>  | 12/51 (24)      | 2/8 (25)  | 25.3                  | 24.1    | 0.902 [0.201-4.045]    | 0.893      |
| <i>DNMT3A</i> | 24/97 (25)      | 3/5 (60)  | NR                    | 13      | 5.719 [1.621-20.181]   | 0.007      |
| <i>IDH2</i>   | 26/97 (27)      | 1/5 (20)  | NR                    | NR      | 0.549 [0.074-4.057]    | 0.557      |
| <i>RUNX1</i>  | 11/50 (22)      | 3/9 (33)  | 25.3                  | 24.6    | 1.173 [0.327-4.212]    | 0.807      |
| <i>SF3B1</i>  | 10/42 (24)      | 0/10 (0)  | NR                    | NR      | 0.033 [0.00-18.828]    | 0.291      |
| <i>SRSF2</i>  | 8/46 (17)       | 2/6 (33)  | NR                    | NR      | 2.183 [0.457-10.436]   | 0.328      |
| <i>TET2</i>   | 10/39 (26)      | 4/20 (20) | 24.7                  | 25.3    | 0.571 [0.178-1.831]    | 0.346      |
| <i>TP53</i>   | 23/95 (24)      | 4/7 (57)  | NR                    | 13.7    | 3.682 [1.228-11.035]   | 0.020      |
| <i>U2AF1</i>  | 8/47 (17)       | 2/5 (40)  | NR                    | NR      | 2.211 [0.468-10.442]   | 0.316      |
| <i>ZRSR2</i>  | 9/49 (18)       | 1/3 (33)  | NR                    | 6.8     | 45.475 [2.843-727.310] | 0.007      |

**Table S6. Univariate analysis for leukemia-free survival based on detected mutations.**  
 Only mutations detected in >5% of evaluated patients where included in this analysis.

| Gene          | Deaths<br>N (%) |           | Median LFS<br>(months) |         | HR [95% CI]            | p value |
|---------------|-----------------|-----------|------------------------|---------|------------------------|---------|
|               | Wildtype        | Mutated   | Wildtype               | Mutated |                        |         |
| <i>ASXL1</i>  | 15/51 (29)      | 2/8 (25)  | 23.3                   | 24.2    | 0.602 [0.137-2.651]    | 0.502   |
| <i>DNMT3A</i> | 28/97 (29)      | 3/5 (60)  | NR                     | 13      | 4.484 [1.300-15.470]   | 0.018   |
| <i>IDH2</i>   | 29/97 (30)      | 2/5 (40)  | NR                     | 22.6    | 1.130 [0.269-4.743]    | 0.867   |
| <i>RUNX1</i>  | 14/50 (28)      | 3/9 (33)  | 24.2                   | 22.6    | 0.948 [0.272-3.308]    | 0.933   |
| <i>SF3B1</i>  | 13/42 (31)      | 0/10 (0)  | NR                     | NR      | 0.032 [0.000-8.262]    | 0.225   |
| <i>SRSF2</i>  | 11/46 (24)      | 2/6 (33)  | NR                     | NR      | 1.529 [0.336-6.960]    | 0.583   |
| <i>TET2</i>   | 13/39 (33)      | 4/20 (20) | 22.7                   | NR      | 0.415 [0.134-1.284]    | 0.127   |
| <i>TP53</i>   | 26/95 (24)      | 5/7 (71)  | NR                     | 13.7    | 3.974 [1.471-10.734]   | 0.006   |
| <i>U2AF1</i>  | 11/47 (23)      | 2/5 (40)  | NR                     | NR      | 1.481 [0.327-6.712]    | 0.611   |
| <i>ZRSR2</i>  | 12/49 (24)      | 1/3 (33)  | NR                     | 6.8     | 22.802 [2.066-251.606] | 0.011   |

**Table S7. Univariate and Multivariate analysis for leukemia-free survival.**

| Variable                                       | Univariate Analysis |               |         | Multivariate Analysis |               |         |
|------------------------------------------------|---------------------|---------------|---------|-----------------------|---------------|---------|
|                                                | HR                  | 95% CI        | p value | HR                    | 95% CI        | p value |
| <b>Age</b><br>≤60 years<br>>60 years           | 1.576               | 0.554-4.487   | 0.394   |                       |               |         |
| <b>WHO Diagnosis</b><br>MDS<br>MDS/MPN         | 1.168               | 0.526-2.591   | 0.703   |                       |               |         |
| <b>Cytopenias</b><br>0-1<br>≥2                 | 1.659               | 0.816-3.373   | 0.162   |                       |               |         |
| <b>BM Blasts</b><br><5%<br>≥5                  | 1.311               | 0.644-2.668   | 0.455   |                       |               |         |
| <b>Cytogenetic risk</b><br>Good<br>Others      | 0.717               | 0.341-1.508   | 0.381   |                       |               |         |
| <b>Transfusion</b><br>Dependent<br>Independent | 1.756               | 0.873-3.534   | 0.114   |                       |               |         |
| <b>IPSS Risk</b><br>Low<br>Intermediate-1      | 1.353               | 0.475-3.856   | 0.572   |                       |               |         |
| <b>MDA LR-MDS</b><br>High<br>Others            | 1.086               | 0.547-2.156   | 0.813   |                       |               |         |
| <b>Response</b><br>CR<br>Non-CR                | 0.448               | [0.208-0.969] | 0.041   | 0.244                 | 0.053-1.131   | 0.071   |
| <b>DNMT3A</b><br>Wildtype<br>Mutated           | 4.484               | 1.300-15.470  | 0.018   | 17.626                | 1.235-251.603 | 0.034   |
| <b>TP53</b><br>Wildtype<br>Mutated             | 3.974               | 1.471-10.734  | 0.006   | 29.348                | 4.384-196.471 | <0.001  |
| <b>ZRSR2</b><br>Wildtype<br>Mutated            | 22.802              | 2.066-251.606 | 0.011   | 54.493                | 3.431-865.433 | 0.005   |

Figure S1

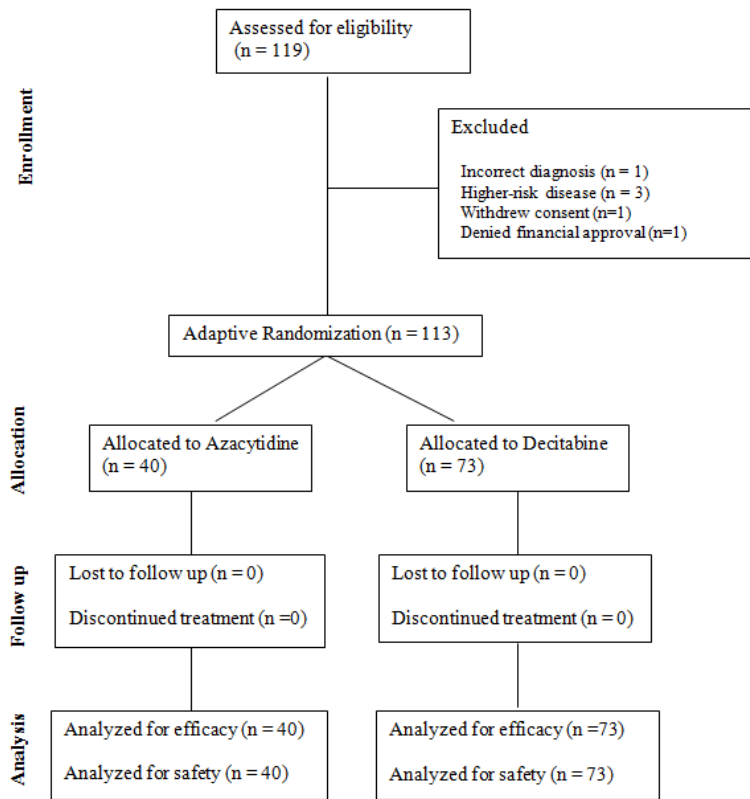

Supplement: blood788497-suppl1.pdf [file blood788497-suppl1.pdf]
